# Supplementary material for: Chromatin organization is a major influence on regional mutation rates in human cancer cells
Source: Springer Nature journal article supplement (doi:10.1038/nature11273), 2012-07-20
Supplement: 41586_2012_BFnature11273_MOESM10_ESM.pdf [file 41586_2012_BFnature11273_MOESM10_ESM.pdf]

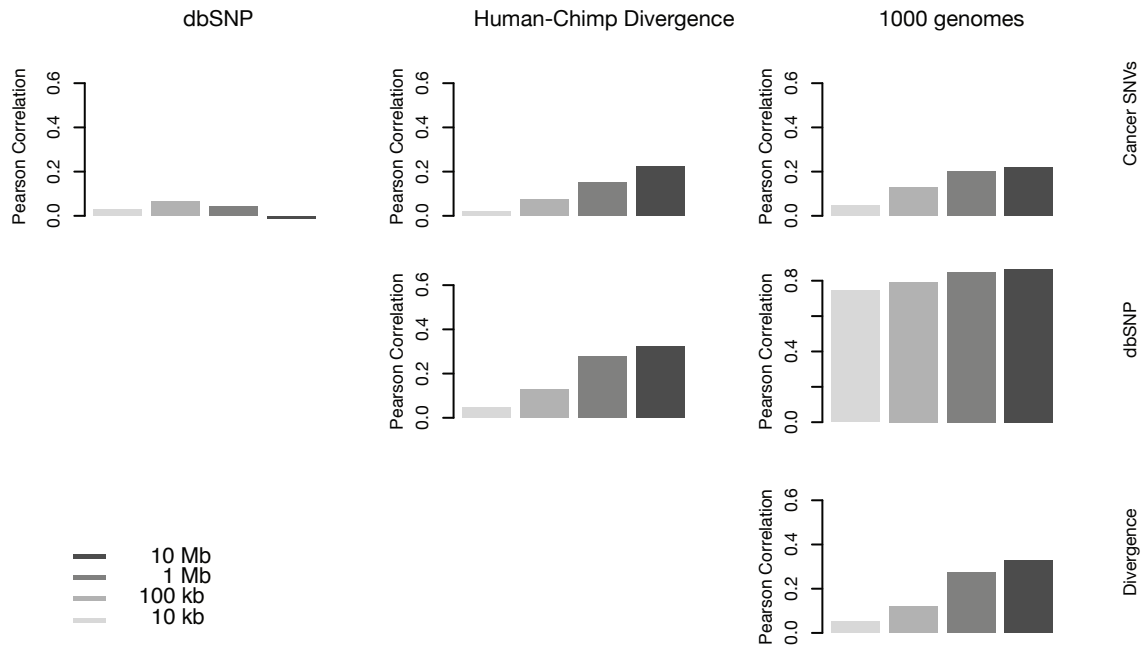

**Supplementary figure 1** Correlations across the human genome between SNP density in cancer genomes, SNP density from dbSNP, and human-chimp divergence quantified in different non-overlapping window sizes.

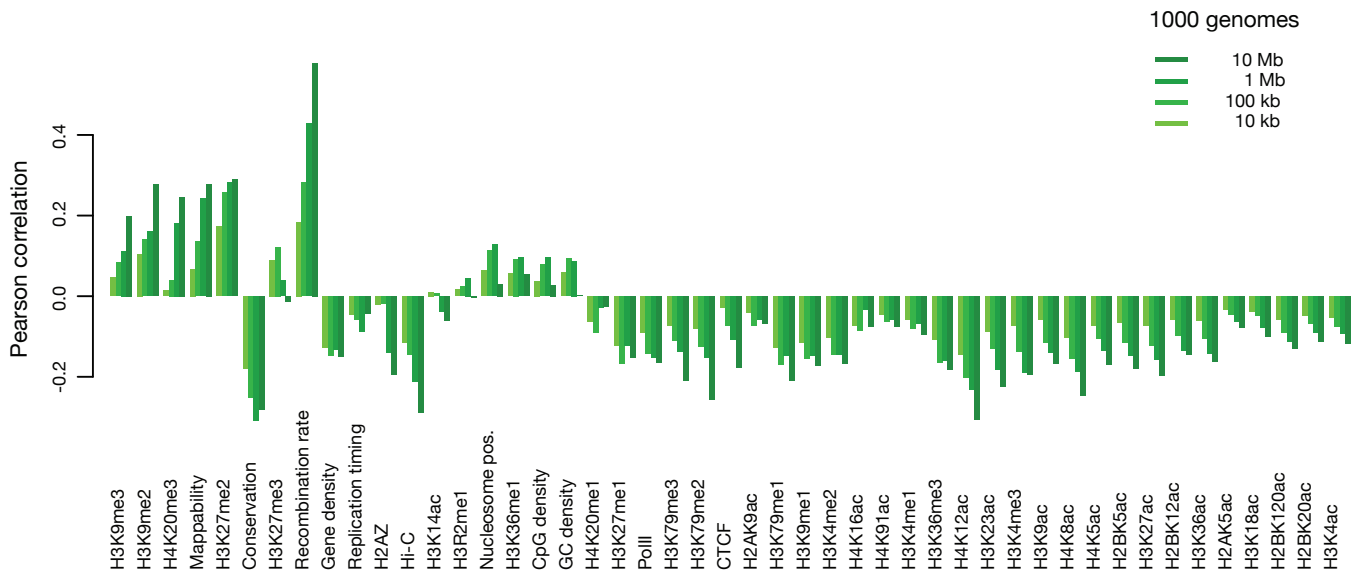

**Supplementary figure 2** Correlation coefficients of germline SNP density from the 1000 genomes projects with all genomic features at different window sizes.

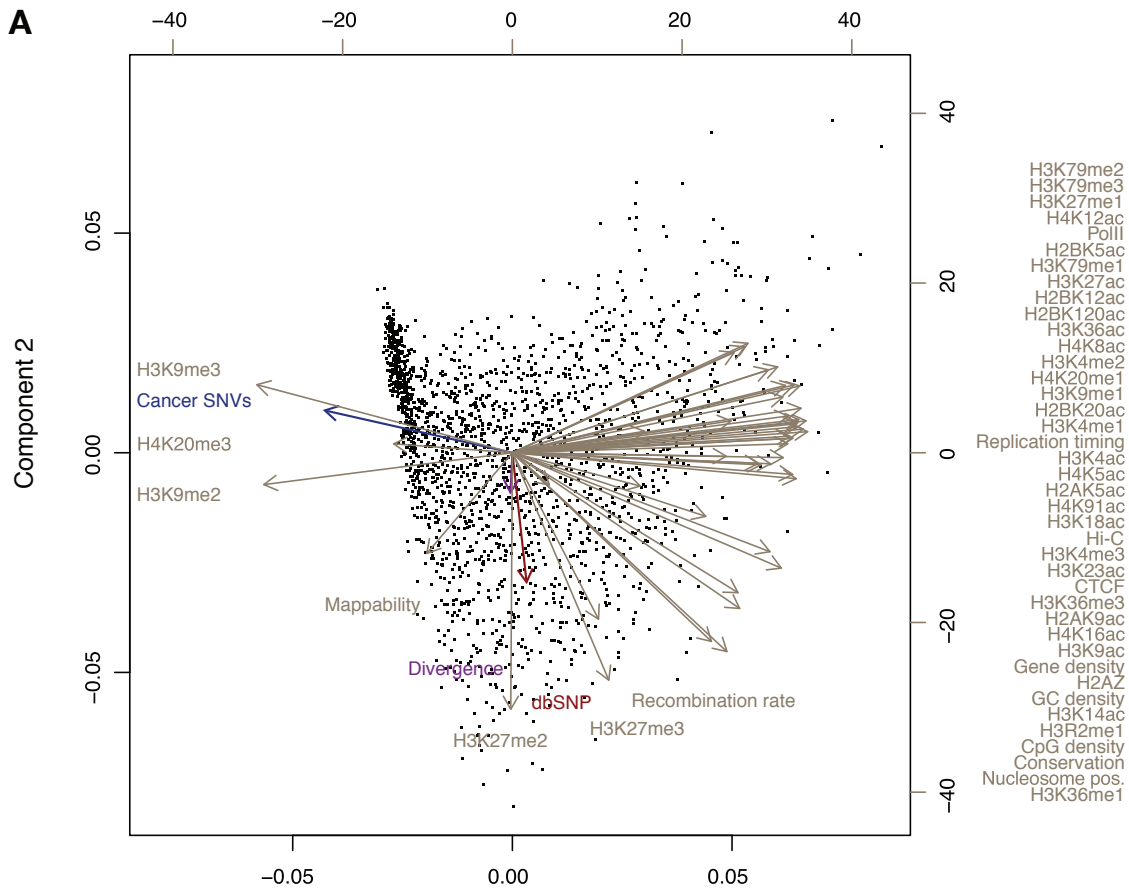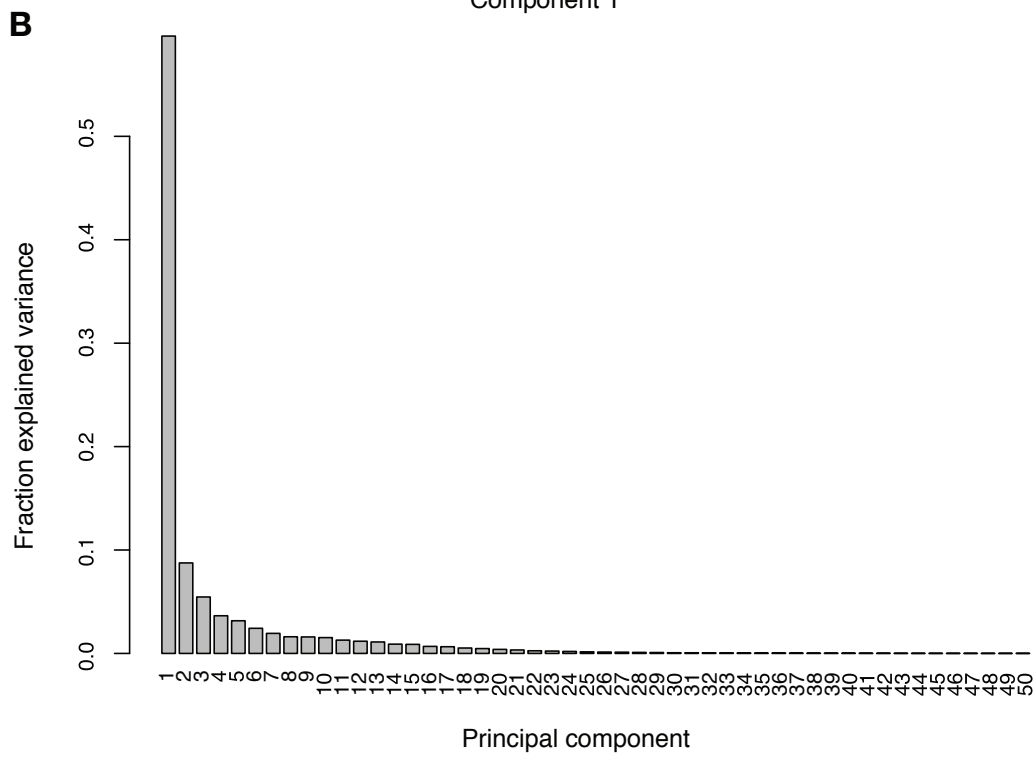

Supplementary figure 3 Principal component analysis of genomic features. **a** Bi-plot









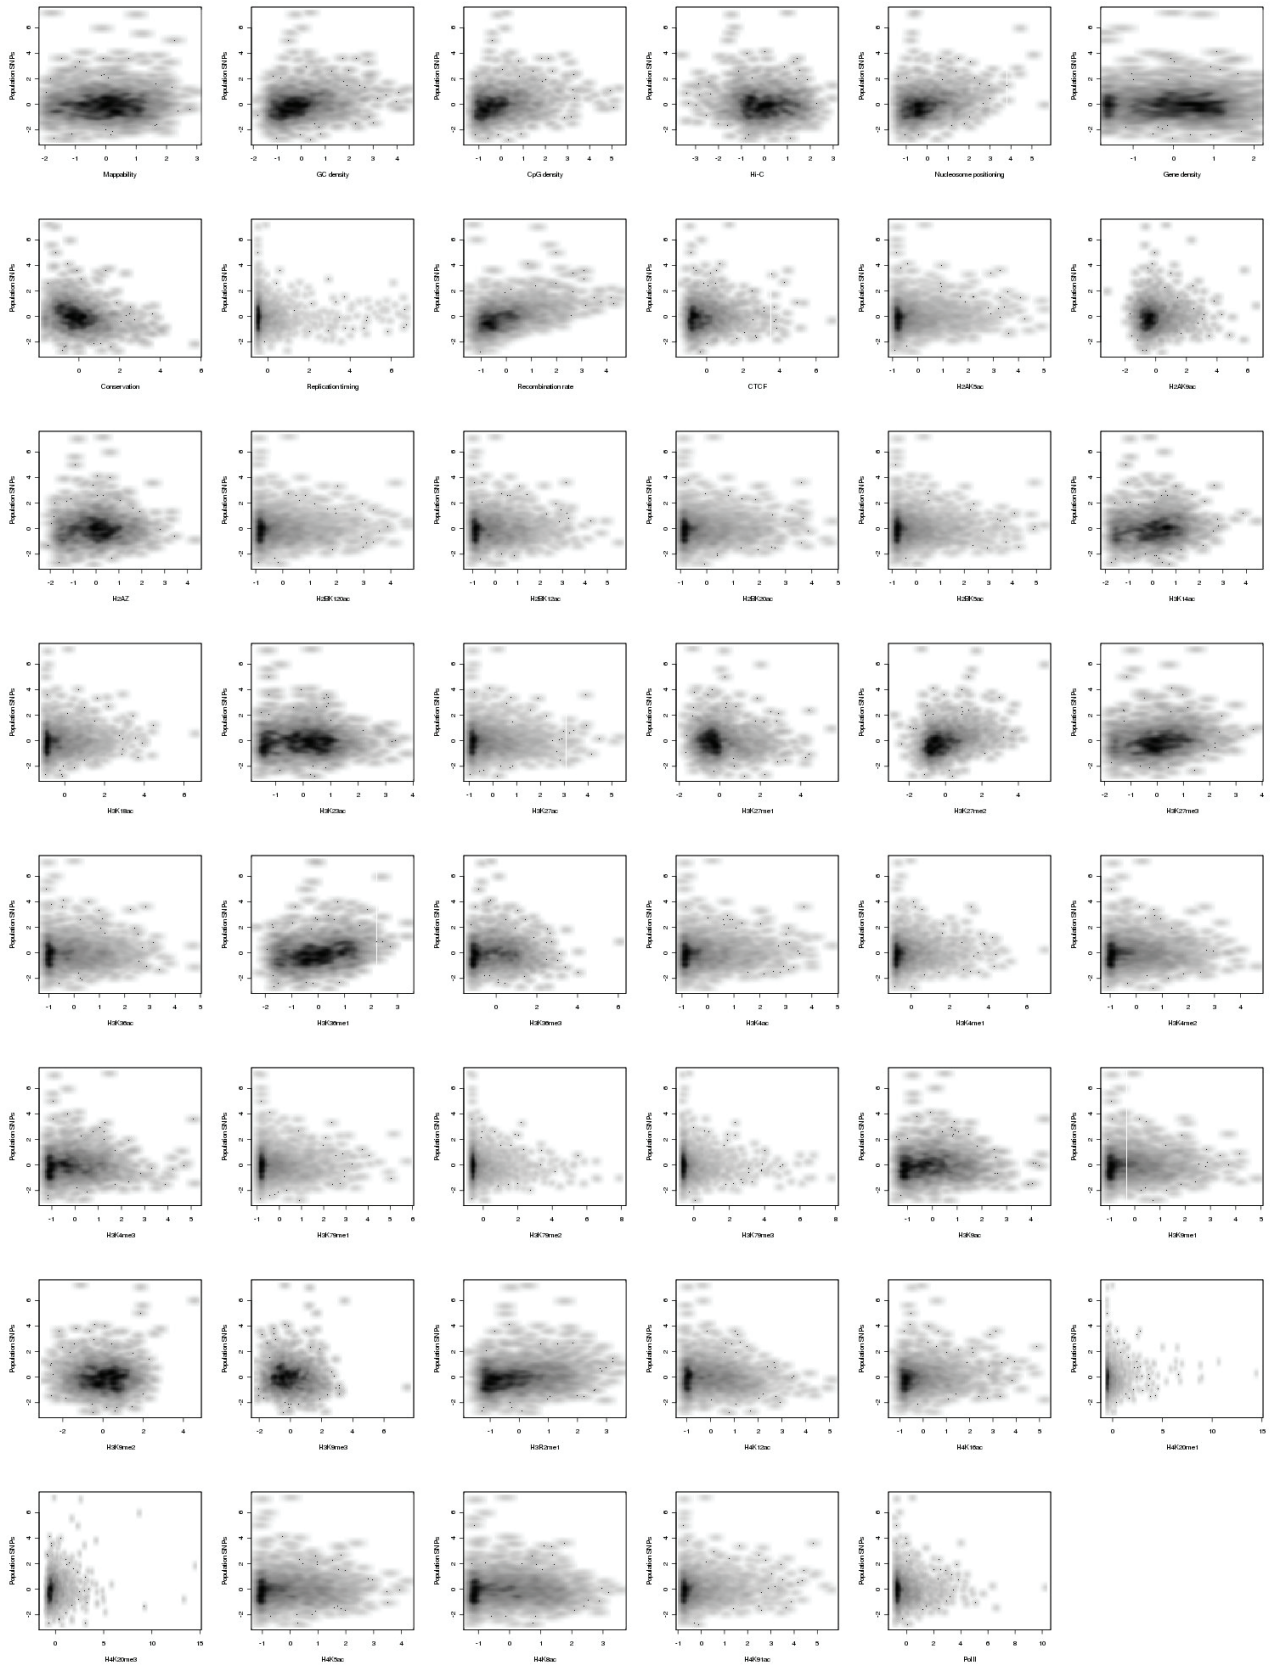

**Supplementary figure 7** Correlations between all genomic features and germline SNP density from dbSNP in non-overlapping 1Mb windows across the human genome (normalized to standard scores).

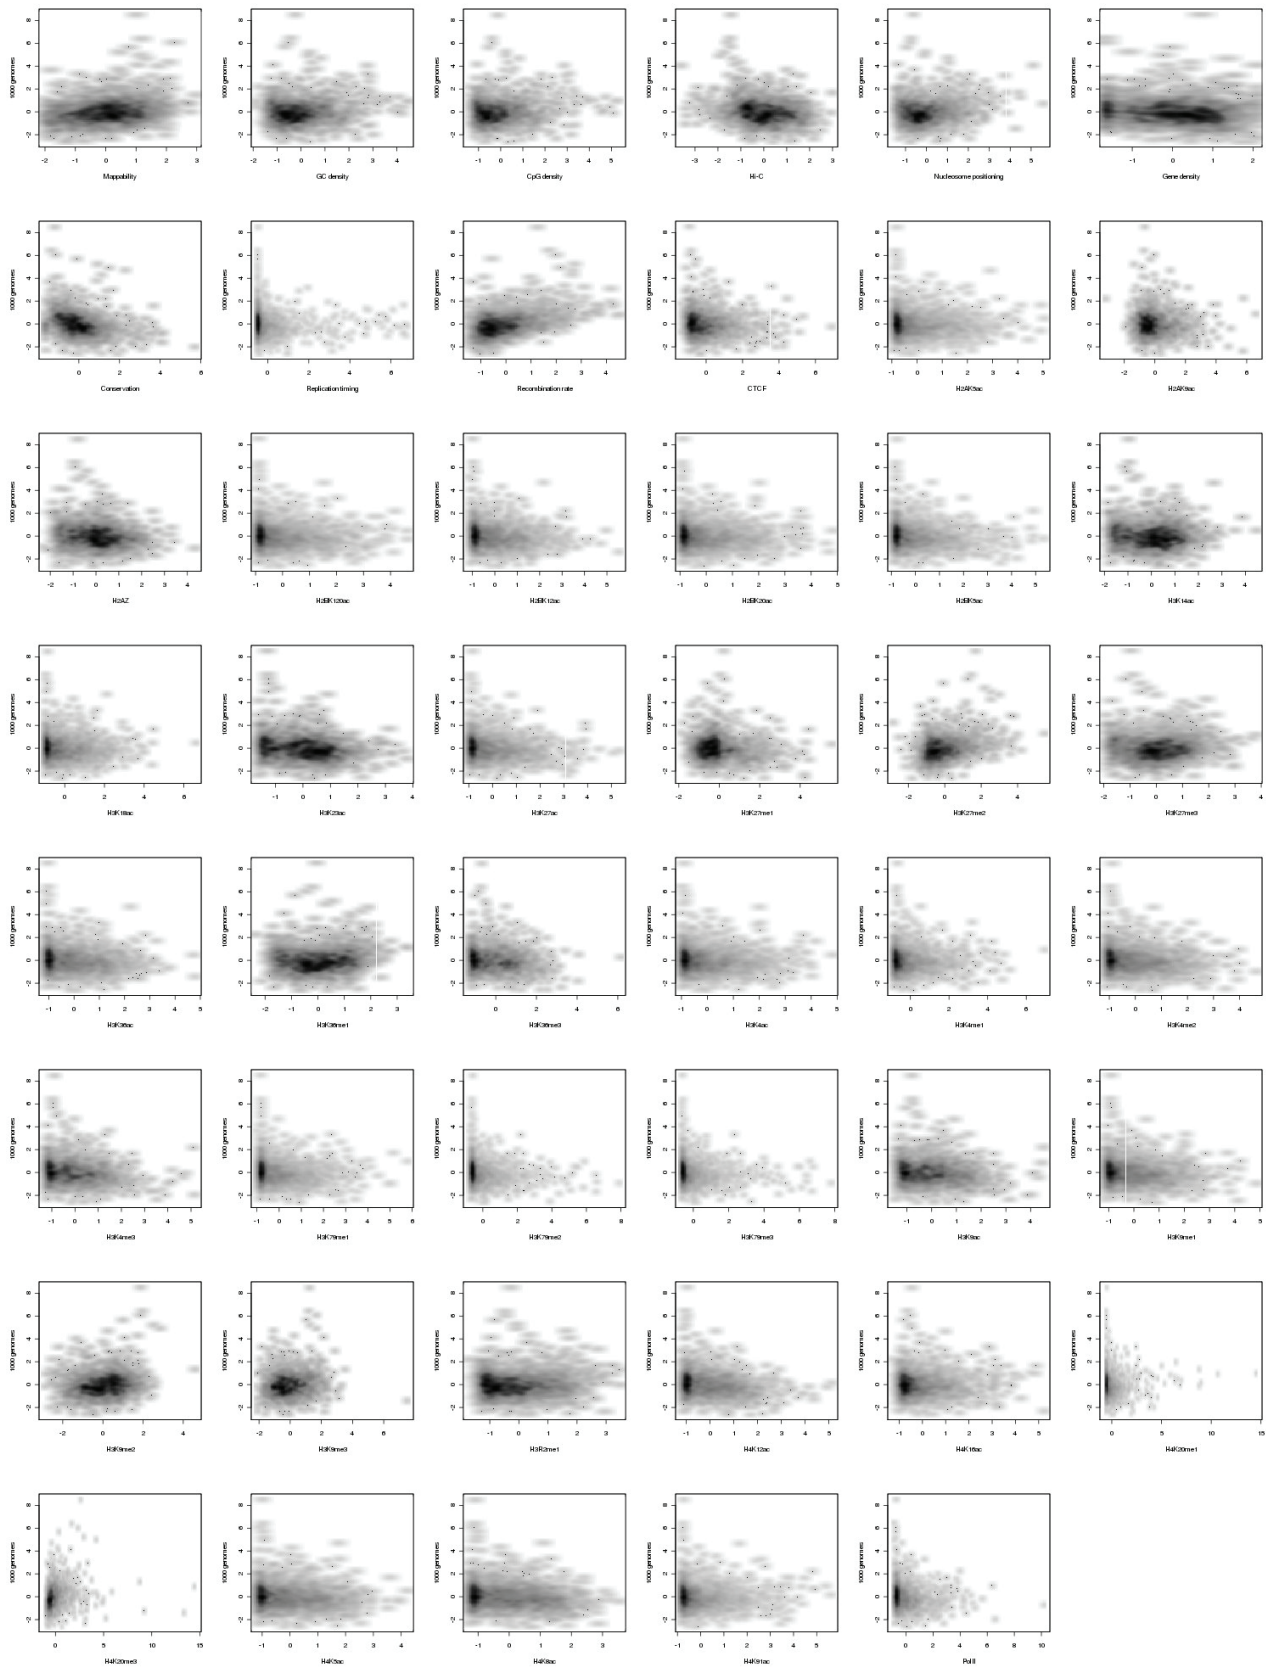

**Supplementary figure 8** Correlations between all genomic features and germline SNP density from the 1000 genomes project in non-overlapping 1Mb windows across the human genome (normalized to standard scores).

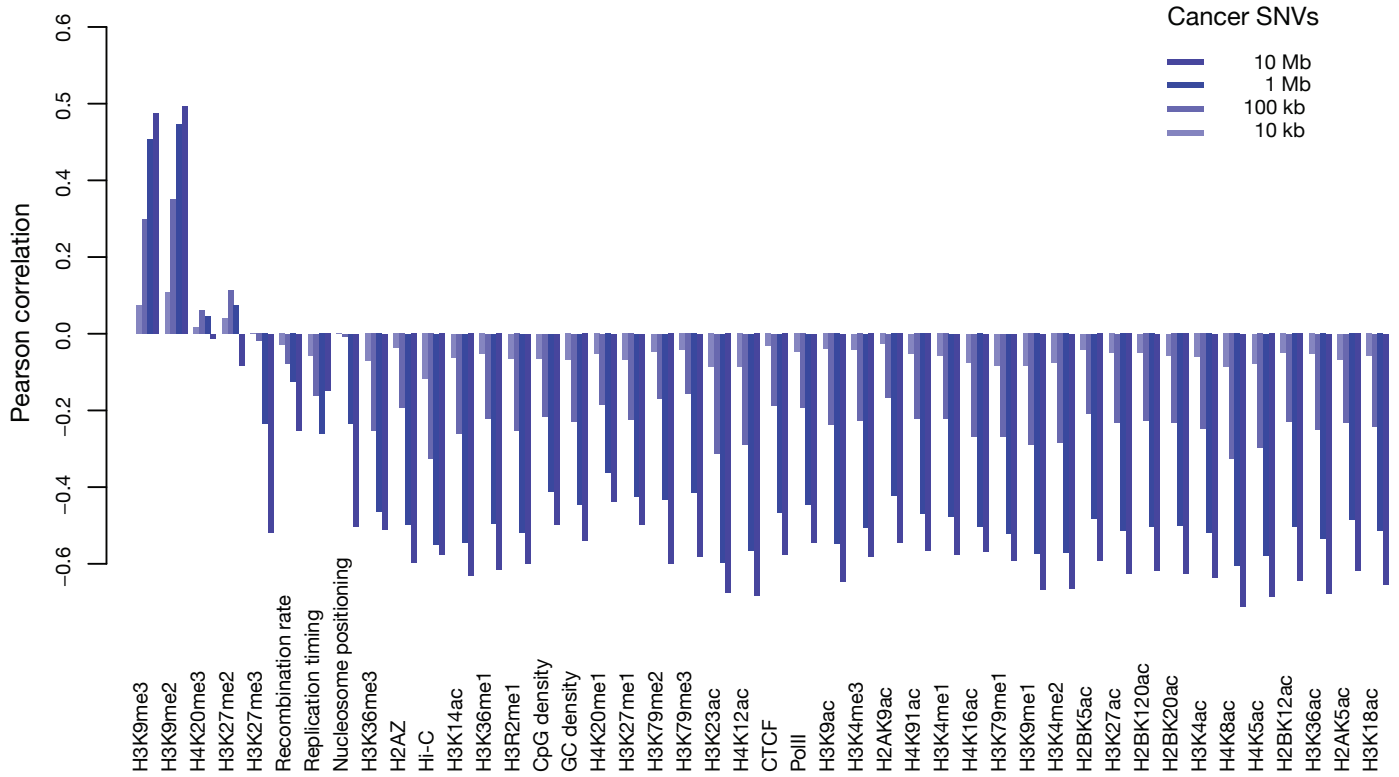

**Supplementary figure 9** Correlations between all genomic features and cancer SNV density, masking out all variants without 20bp of unique flanking sequence in either direction.



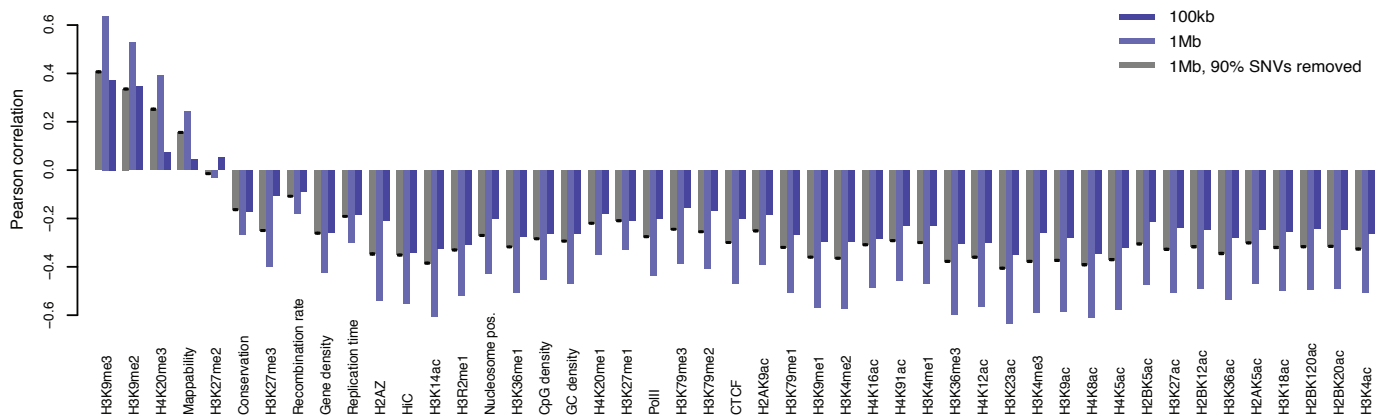

**Supplementary figure 10** Correlations between all genomic features and cancer SNV density at 1Mb resolution, but randomly removing 90% of all SNVs on each chromosome. Error bars indicate 95% confidence intervals from 100 randomisations. When sub-sampling the SNVs, the correlations reduce to values similar to those detected with the full dataset at 100kb resolution, suggesting that the weaker correlations in smaller window sizes could be due to the reduced number of mutations per window.

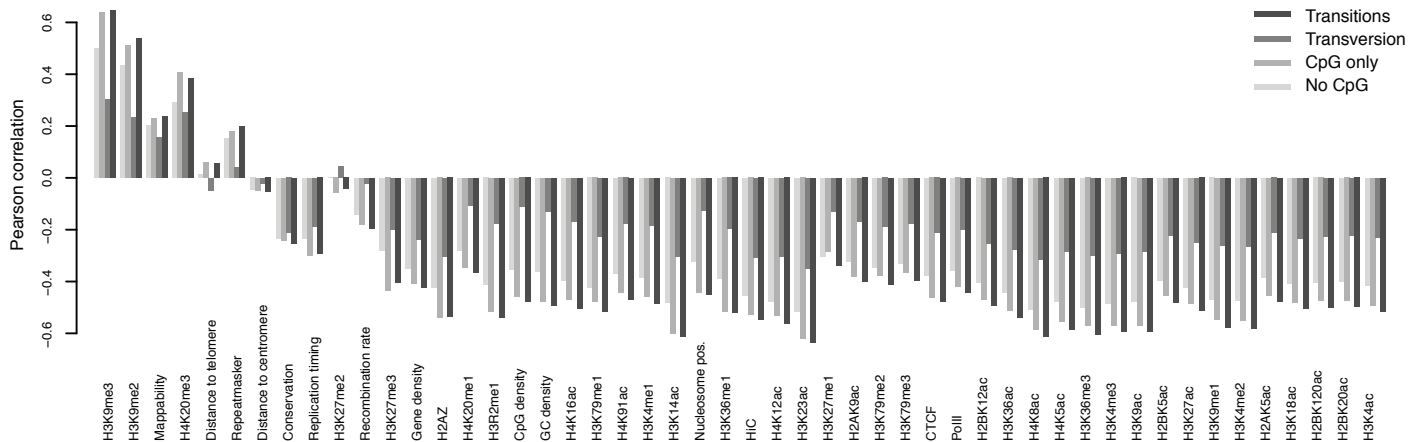

**Supplementary figure 11** Correlations between all genomic features and cancer SNV density at 1Mb resolution, considering only transitions, transversions, CpG mutations, or non-CpG mutations. Correlations with distance to telomere, distance to centromere, and repeat content as determined using Repeatmasker are also shown.
